# Supplementary material for: Facile fabrication of superhydrophobic coatings with polyimide particles using a reactive electrospraying process
Source: Royal Society of Chemistry journal article supplement (doi:10.1039/c2jm32210b), 2012-01-01

Supporting information

## Facile fabrication of superhydrophobic coatings with polyimide particles using a reactive electrospaying process

*Jin Young Park,<sup>ab</sup> Kyung Ok Oh,<sup>a</sup> Jong Chan Won,<sup>a</sup> Haksoo Han,<sup>b</sup> Hyun Min Jung,<sup>\*c</sup>  
and Yong Seok Kim<sup>\*a</sup>*

<sup>a</sup>Center for Information & Electronics Materials Research, Korea Research Institute of  
Chemical Technology, P.O.Box 107, Yuseong-gu, Daejeon, 305-600, Korea

<sup>b</sup>Electronic Material Laboratory, Department of Chemical and Biomolecular Engineering,  
Yonsei university, 262 Seongsanno, Seodaemun-Gu, Seoul, 120-749, Korea

<sup>c</sup>Department of Applied Chemistry, Kumoh National Institute of Technology, Sanho-ro 77,  
Gumi, Gyeongbuk, 730-701, Korea

\*To whom correspondence should be addressed

**Fig. S1** The cross-sectional TEM image of the microtoming epoxy resin containing dimpled PI particles.

**Fig. S2** Optical microscope images of microdrops: (a) 0 min; (b) 5 min; (c) 30 min; (d) 50 min. Operating parameter : PAA concentration 10 wt%, flow rate 0.5 ml/h, applied voltage 8.0 kV, collector temperature 30 °C.

**Fig. S3** IR spectrum of fully imidized PI film and PI particles prepared at each stage of thermal imidization:(a) reference PI film; (b) PI particles on heated substrate at 200 °C; (c) cured PI particles at 300 °C.

**Fig. S4** SEM images of deposition of PI particles as coating on ITO glass with different particle size: (a, c) 0.2 mLh<sup>-1</sup>; (b, d) 0.5 mLh<sup>-1</sup>. Operation parameter: PAA concentration 10 wt%, applied voltage 12.8 kV and 14.0 kV, respectively.

**Fig. S5** Dynamic contact angle of PI particles coating layer: (a, b, c) advancing contact angle; (d, e, f) receding contact angle.

**Fig. S1** TEM image of the cross-section of PI particles with dimple morphology.

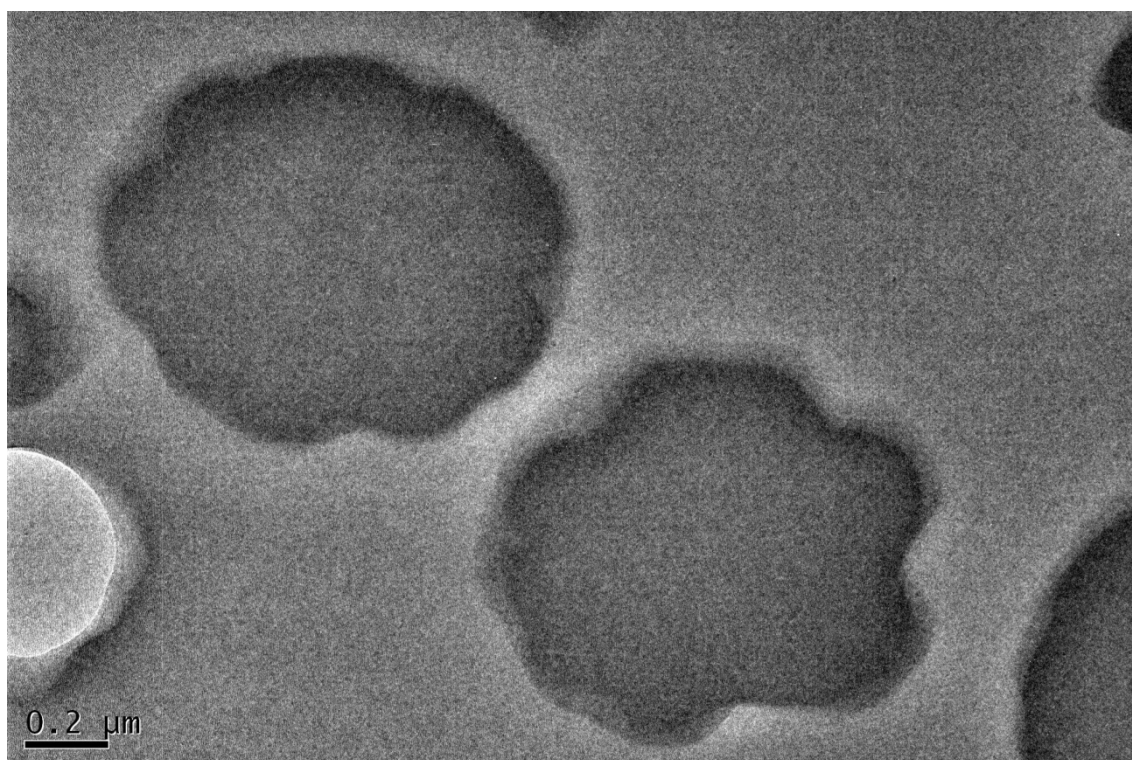

**Fig. S2** Optical microscope images of microdrops: (a) 0 min; (b) 5 min; (c) 30 min; (d) 50 min. Operating parameter : PAA concentration 10 wt%, flow rate 0.5 ml/h, applied voltage 8.0 kV, collector temperature 30 °C.

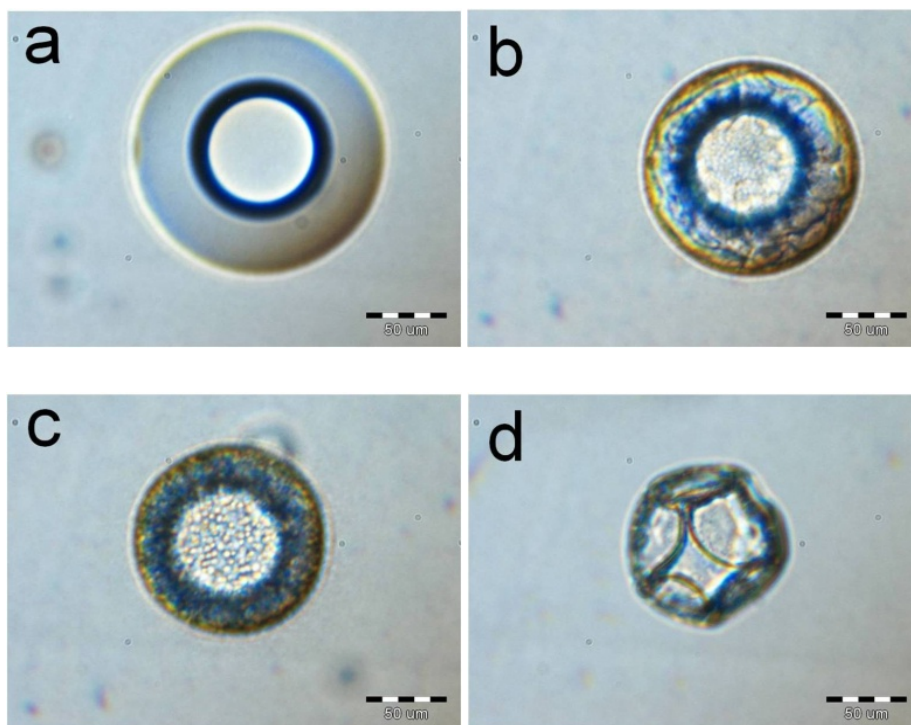

**Fig. S3** IR spectrum of fully imidized PI film and PI particles prepared at each stage of thermal imidization:(a) reference PI film; (b) PI particles on heated substrate at 200 °C; (c) cured PI particles at 300 °C.

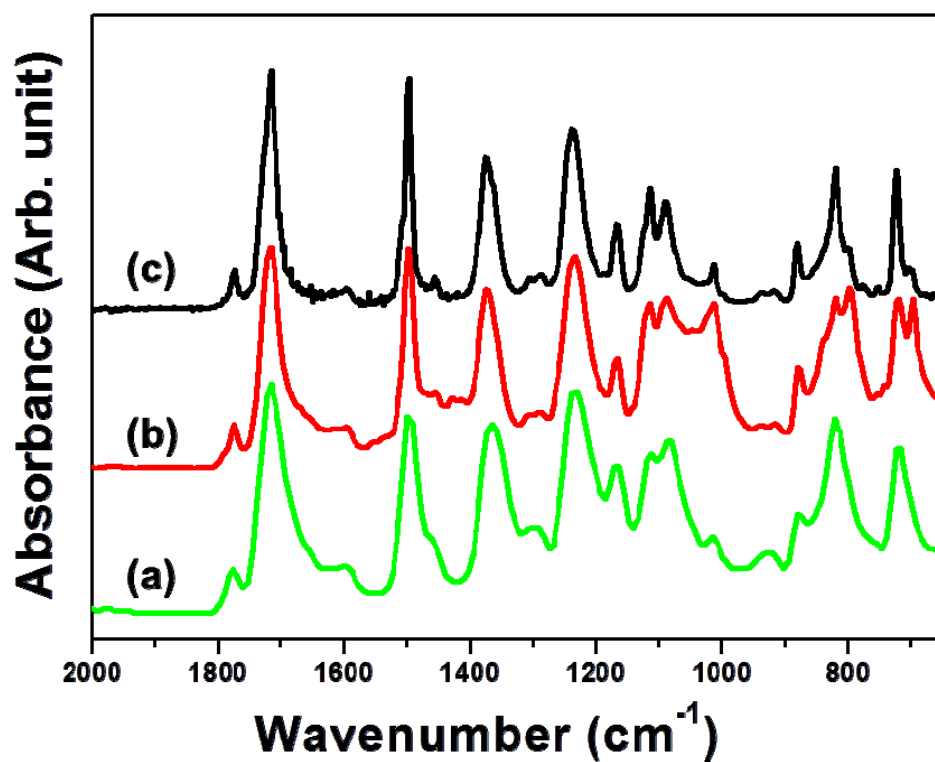

**Fig. S4** SEM images of deposition of PI particles as coating on ITO glass with different particle size: (a, c)  $0.2 \text{ mLh}^{-1}$ ; (b, d)  $0.5 \text{ mLh}^{-1}$ . Operation parameter: PAA concentration 10 wt%, applied voltage 12.8 kV and 14.0 kV, respectively.

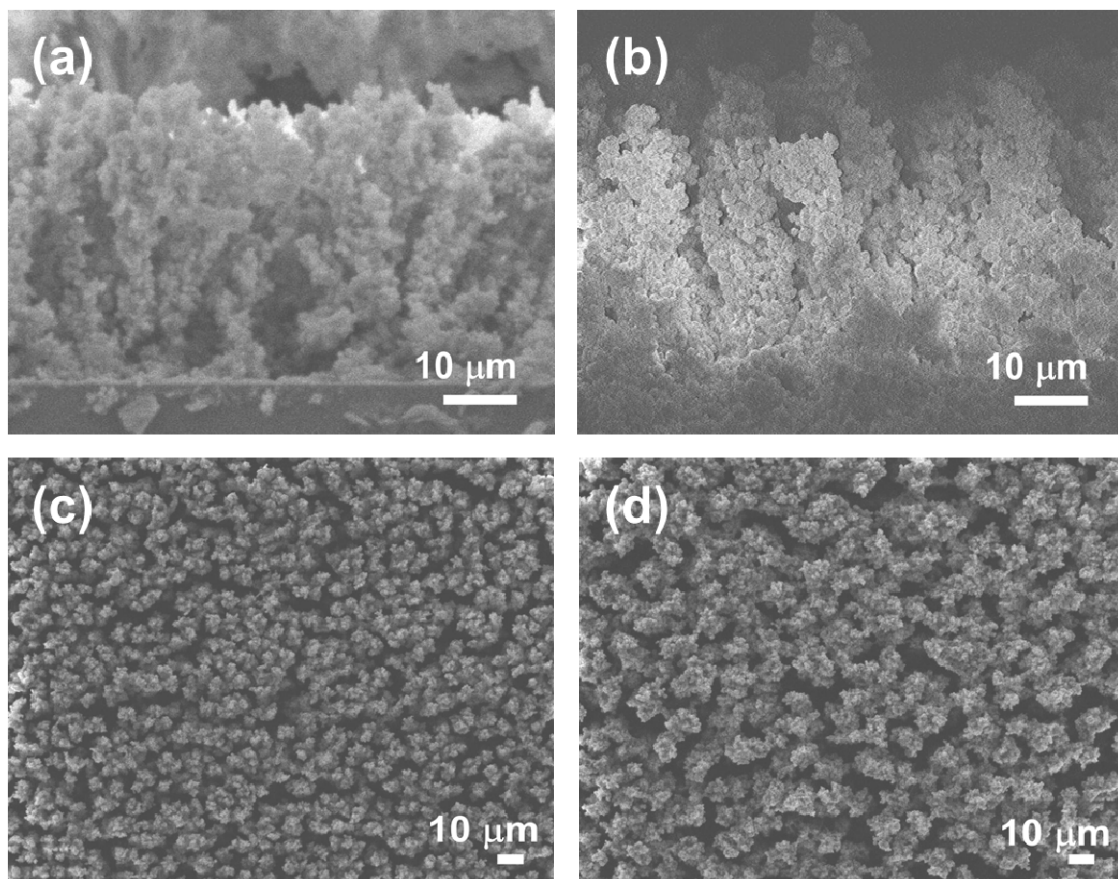



**Fig. S5** Dynamic contact angle of PI particles coating layer: (a, b, c) advancing contact angle; (d, e, f)

receding contact angle.

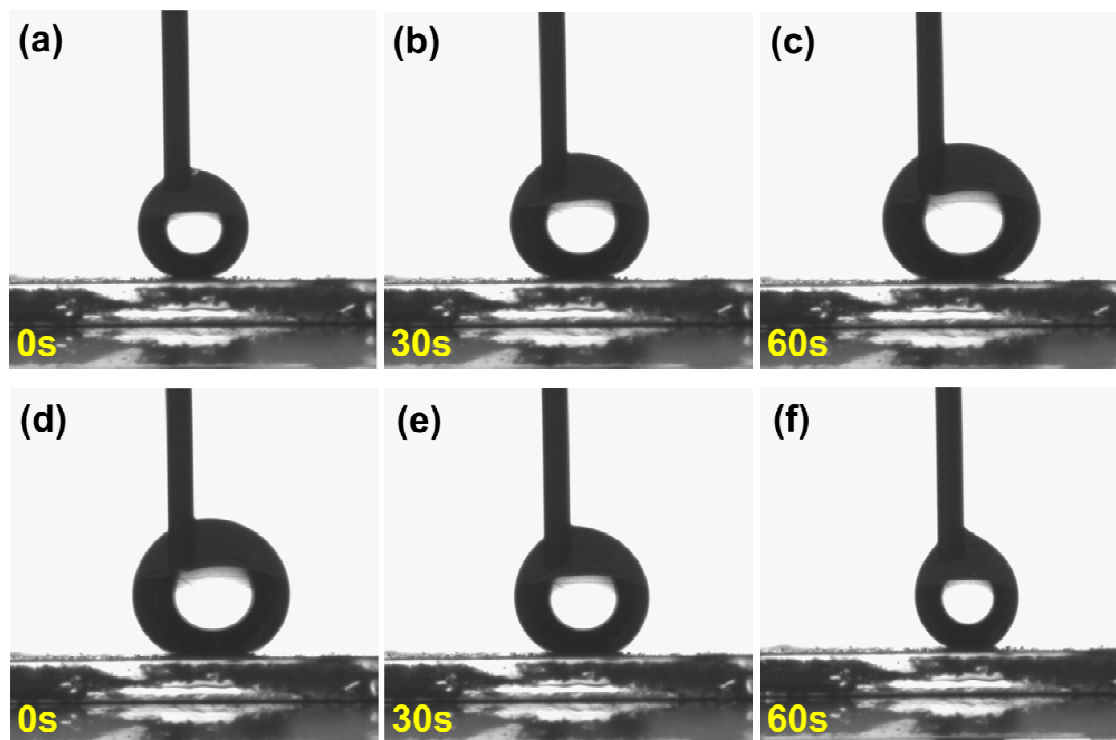

Supplement: c2jm32210b.pdf [file c2jm32210b.pdf]
